# Supplementary material for: Effects of transition metal cations and temperature on the luminescence of a 3-cyano-4-dicyanomethylene-5-oxo-4,5-dihydro-1H-pyrrole-2-olate anion
Source: Royal Society of Chemistry journal article supplement (doi:10.1039/d1nj01225h), 2021-01-01
Supplement: d1nj01225h1.pdf [file d1nj01225h1.pdf]

**Supplementary Information for**

Effects of transition metal cations and temperature on luminescence of  
3-cyano-4-dicyanomethylene-5-oxo-4,5-dihydro-1*H*-pyrrole-2-olate anion

Stanislav I. Gurskiy,<sup>a</sup> Sergey S. Maklakov,<sup>b</sup> Natalia E. Dmitrieva<sup>c</sup> and Viktor A. Tafeenko<sup>c</sup>

<sup>a</sup>*Moscow State University of Civil Engineering, Yaroslavskoye Shosse, 26, 129337, Moscow, Russia.*

<sup>b</sup>*Institute for Theoretical and Applied Electromagnetics RAS (ITAE RAS), Izhorskaya St., 13, 125412, Moscow, Russia.*

<sup>c</sup>*Chemistry Department, Lomonosov Moscow State University, Leninskie Gory, 1, Building 3, GSP-1, 119991, Moscow, Russia.*

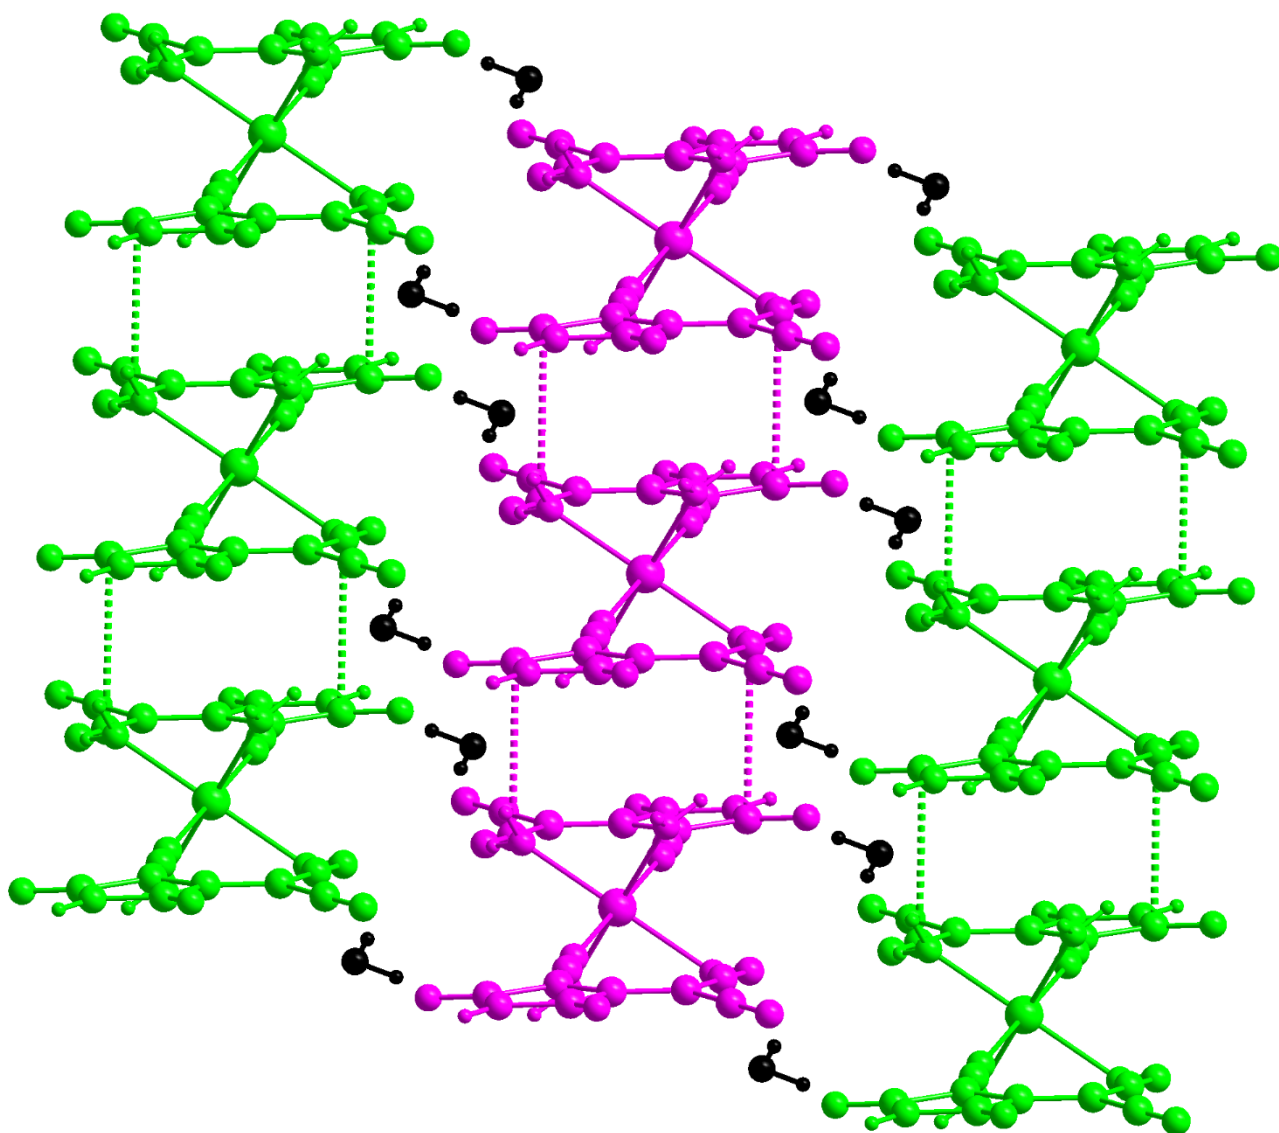

**Fig. S1** Walls (marked with green and pink), which are built of  $[\text{Mn}(\text{HA})_2(\text{H}_2\text{O})_4]_n$  infinite rods, in the crystal structure of complex  $[\text{Mn}(\text{HA})_2(\text{H}_2\text{O})_4] \cdot 2\text{H}_2\text{O}$  (**1**). Water solvent molecules (marked with black) are located between the walls.  $\pi$ - $\pi$ -Stacking interactions are depicted as dotted lines.

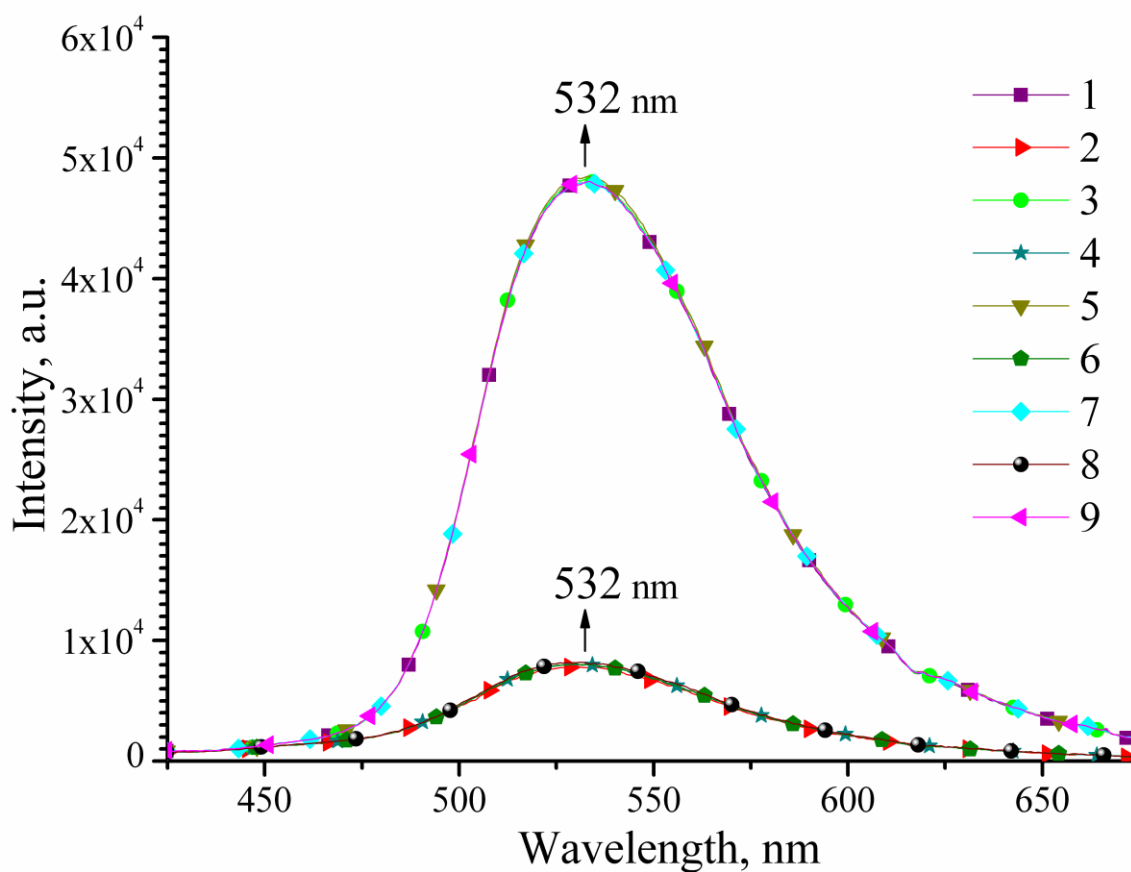

**Fig. S2** Photoluminescence spectra recorded during repeated heating (up to 122-125 °C) and cooling (down to 27 °C) cycles of ashless cellulose filter paper saturated with  $\text{Mn}(\text{HA})_2$  ( $2.9 \cdot 10^{-3}$  mol/L) water solution. Excitation wavelength is 365 nm. Paper temperatures are: (1) 27 °C, (2) 125 °C, (3) 27 °C, (4) 123 °C, (5) 27 °C, (6) 123 °C, (7) 27 °C, (8) 122 °C, (9) 27 °C.

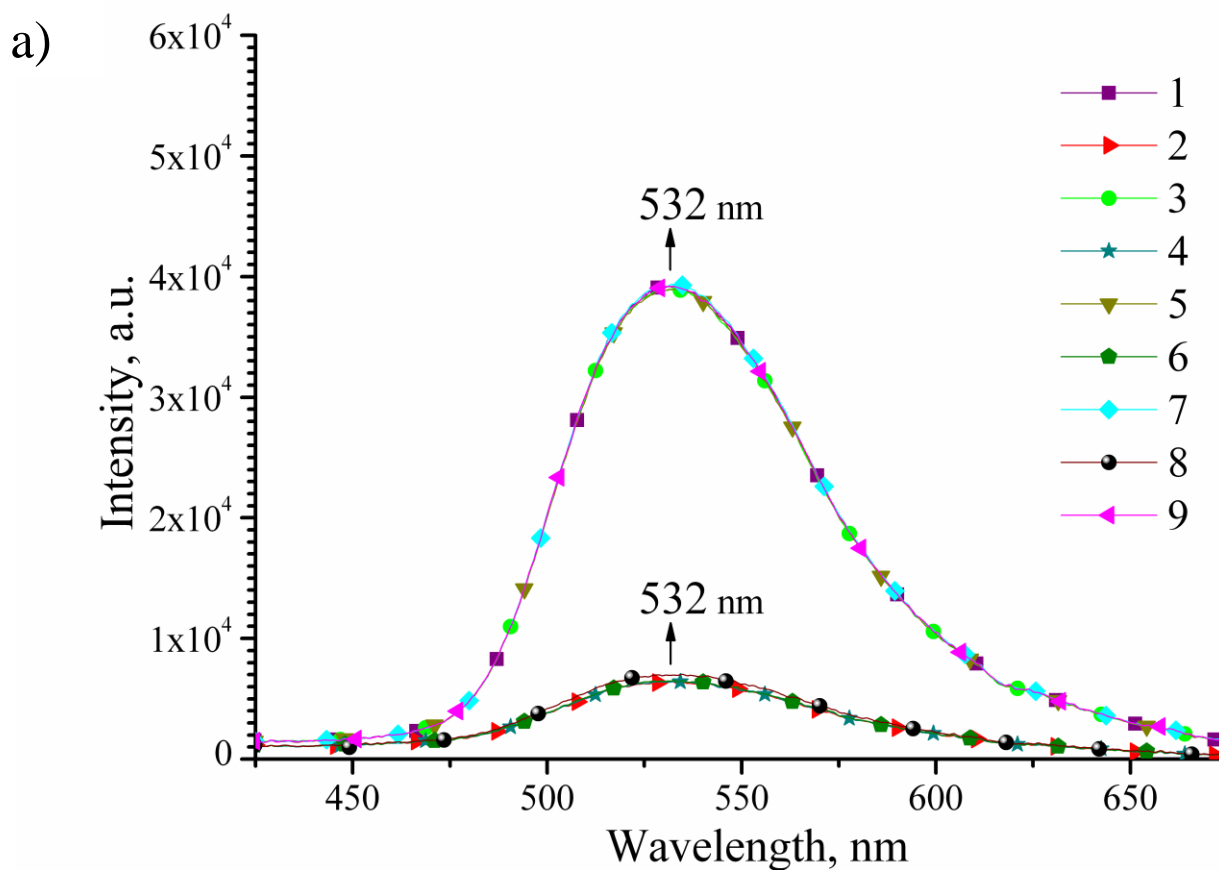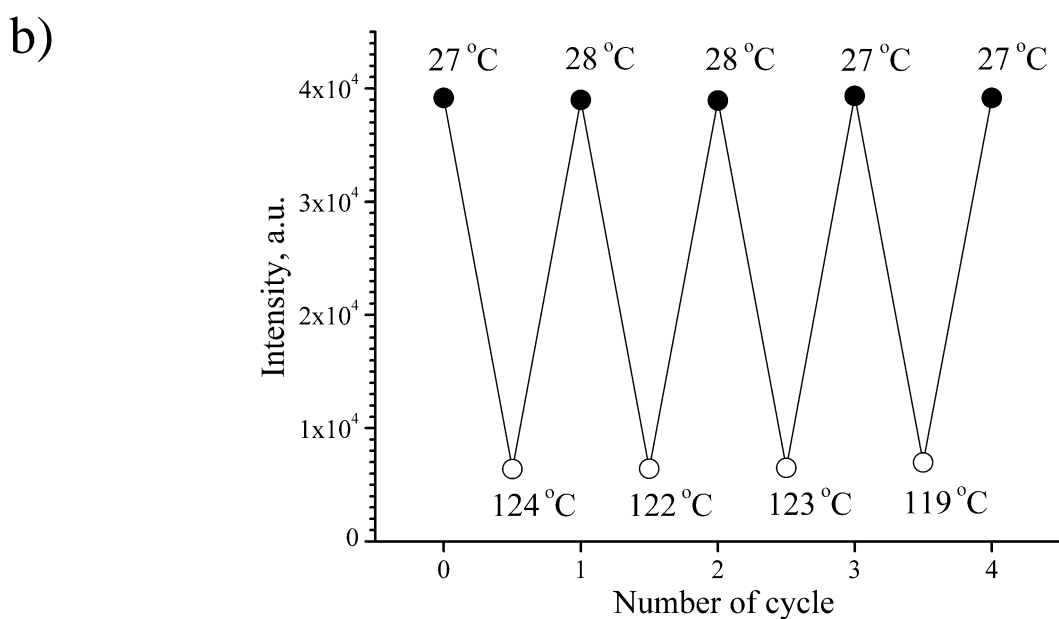

**Fig. S3** Photoluminescence of ashless cellulose filter paper saturated with  $\text{Zn}(\text{HA})_2$  ( $1.1 \cdot 10^{-3}$  mol/L) water solution (excitation wavelength is 365 nm):

(a) Spectra recorded during repeated heating (up to 122-124 °C) and cooling (down to 27-28 °C) cycles. Paper temperatures are: (1) 27 °C, (2) 124 °C, (3) 28 °C, (4) 122 °C, (5) 28 °C, (6) 123 °C, (7) 27 °C, (8) 119 °C, (9) 27 °C;

(b) Reversible switching of photoluminescence intensity at 532 nm by repeated heating (up to 119-124 °C) and cooling (down to 27-28 °C) cycles.

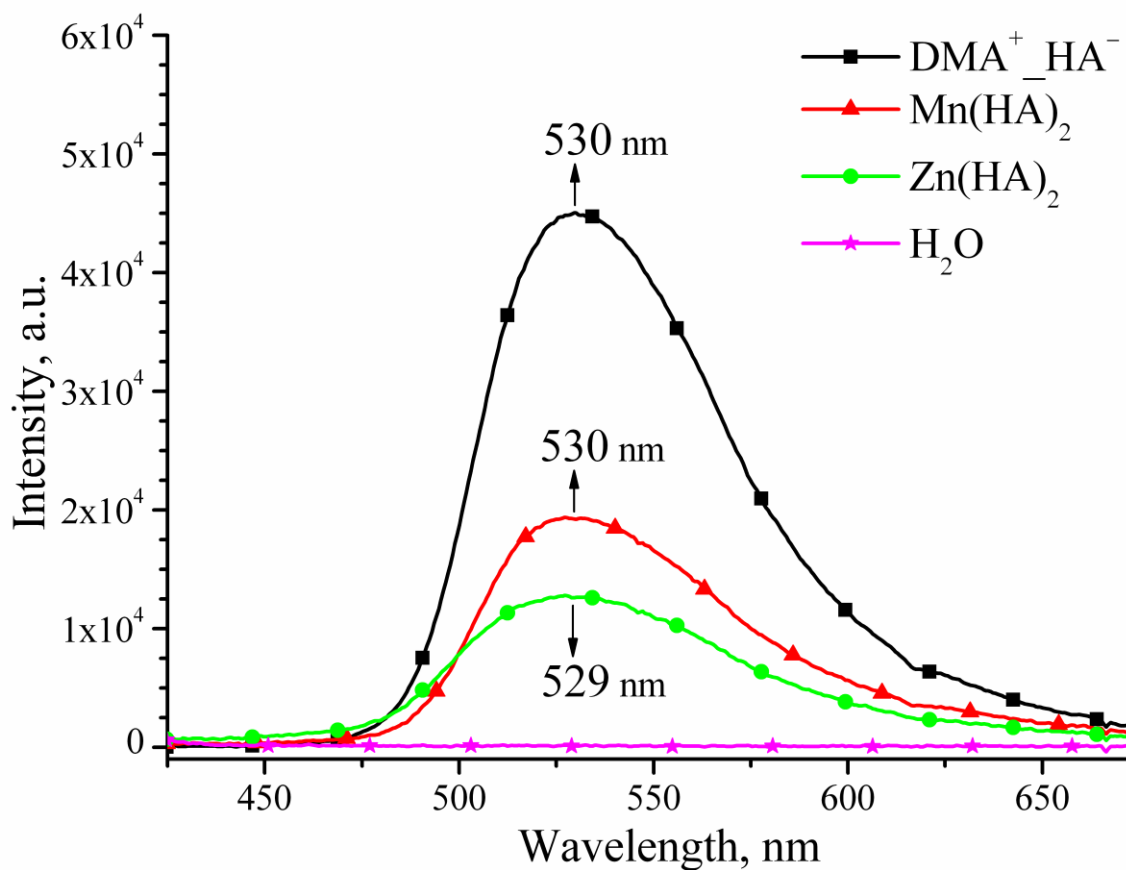

**Fig. S4** Photoluminescence spectra of salts  $\text{M}(\text{HA})_2$  ( $\text{M} = \text{Mn}, \text{Zn}$ ),  $\text{DMA}^+ \text{HA}^-$  ( $\text{DMA}^+ = N,N$ -dimethylanilinium cation) dissolved in water. Excitation wavelength is 365 nm. Concentration of  $\text{M}(\text{HA})_2$  in solution is  $2.9 \cdot 10^{-4}$  mol/L ( $\text{M} = \text{Mn}$ ),  $1.1 \cdot 10^{-4}$  mol/L ( $\text{M} = \text{Zn}$ ). Concentration of  $\text{DMA}^+ \text{HA}^-$  in solution is  $2.9 \cdot 10^{-4}$  mol/L.

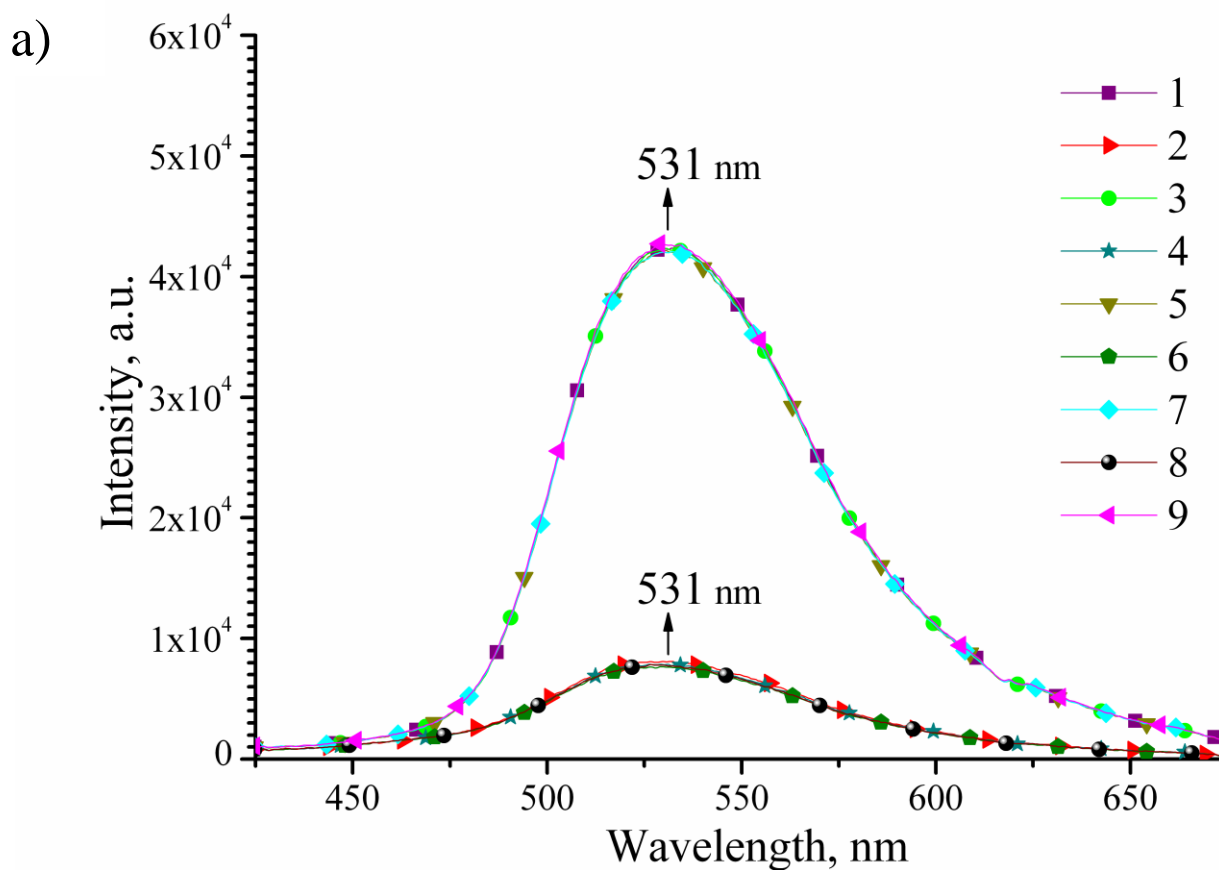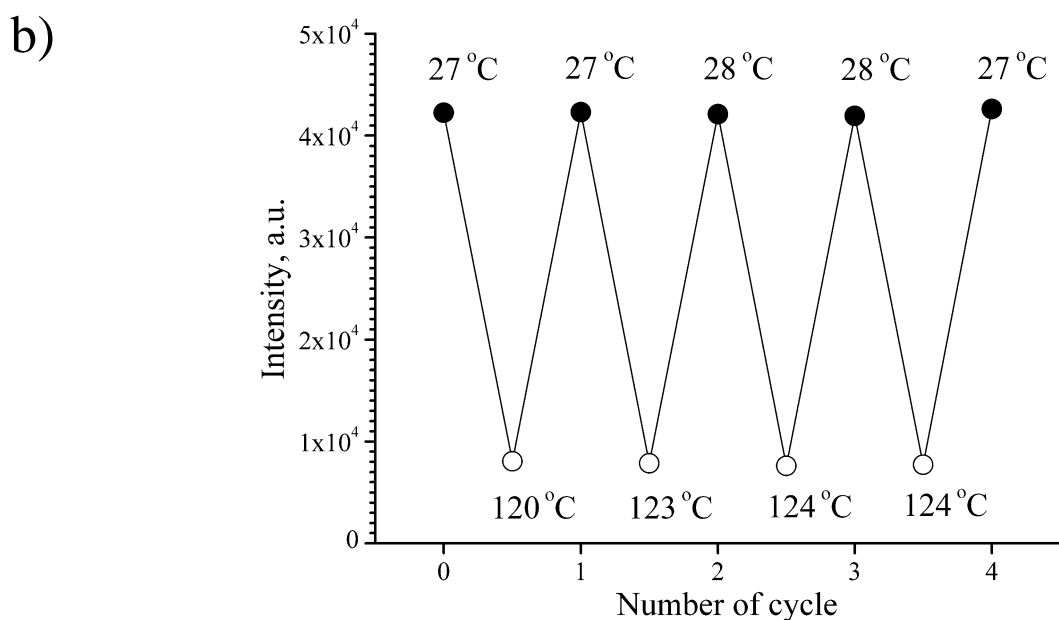

**Fig. S5** Photoluminescence of ashless cellulose filter paper saturated with DMA<sup>+</sup>HA<sup>-</sup> ( $2.9 \cdot 10^{-3}$  mol/L) water solution (excitation wavelength is 365 nm):

(a) Spectra recorded during repeated heating (up to 120-124 °C) and cooling (down to 27-28 °C) cycles. Paper temperatures are: (1) 27 °C, (2) 120 °C, (3) 27 °C, (4) 123 °C, (5) 28 °C, (6) 124 °C, (7) 28 °C, (8) 124 °C, (9) 27 °C;

(b) Reversible switching of the emission intensity at 531 nm by repeated heating (up to 120-124 °C) and cooling (down to 27-28 °C) cycles.

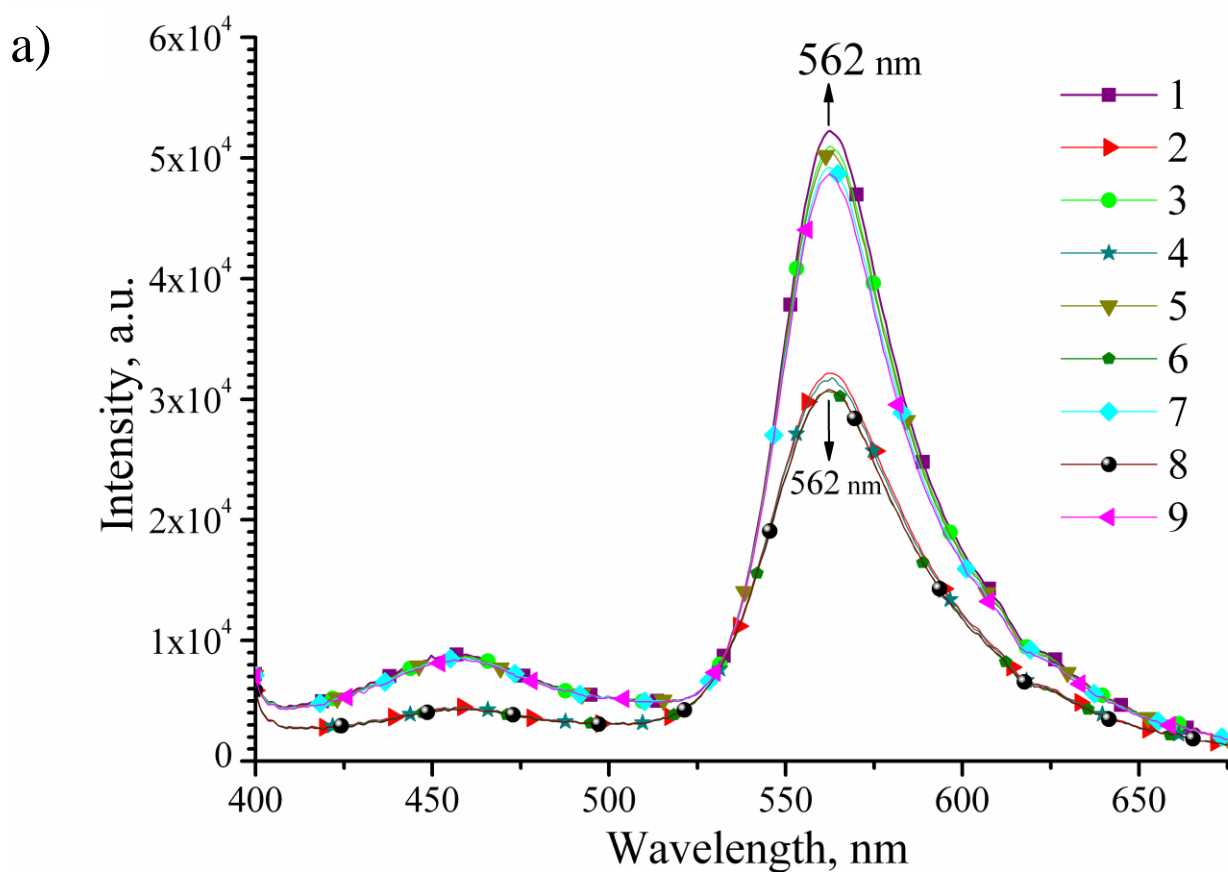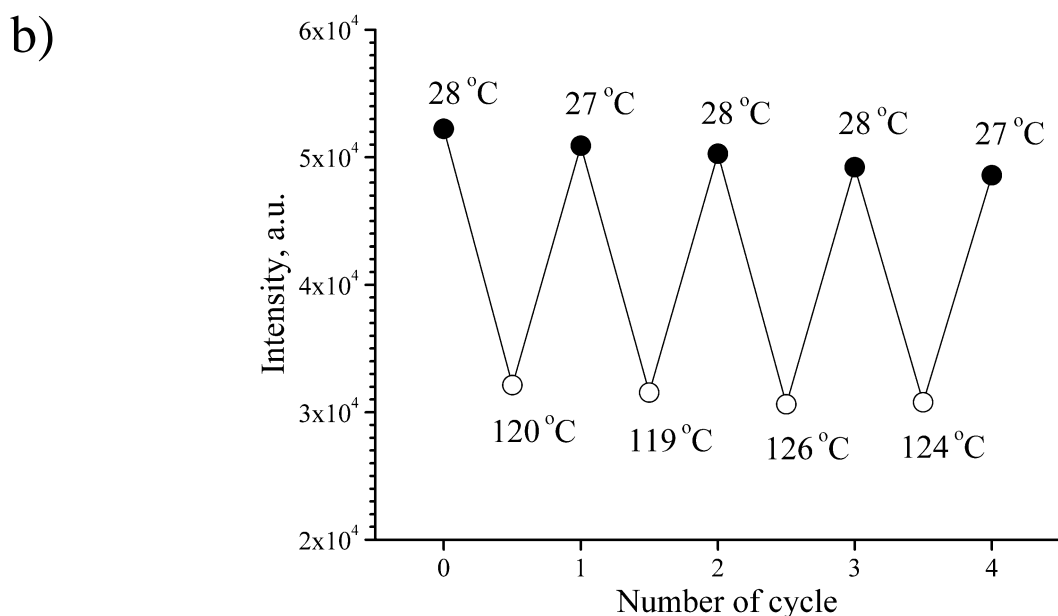

**Fig. S6** Photoluminescence of ashless cellulose filter paper saturated with Rhodamine 6G ( $6.1 \cdot 10^{-5}$  mol/L) water solution (excitation wavelength is 365 nm):

(a) Spectra recorded during repeated heating (up to 119-126 °C) and cooling (down to 27-28 °C) cycles. Paper temperatures are: (1) 28 °C, (2) 120 °C, (3) 27 °C, (4) 119 °C, (5) 28 °C, (6) 126 °C, (7) 28 °C, (8) 124 °C, (9) 27 °C;

(b) Reversible switching of the emission intensity at 562 nm by repeated heating (up to 119-126 °C) and cooling (down to 27-28 °C) cycles.

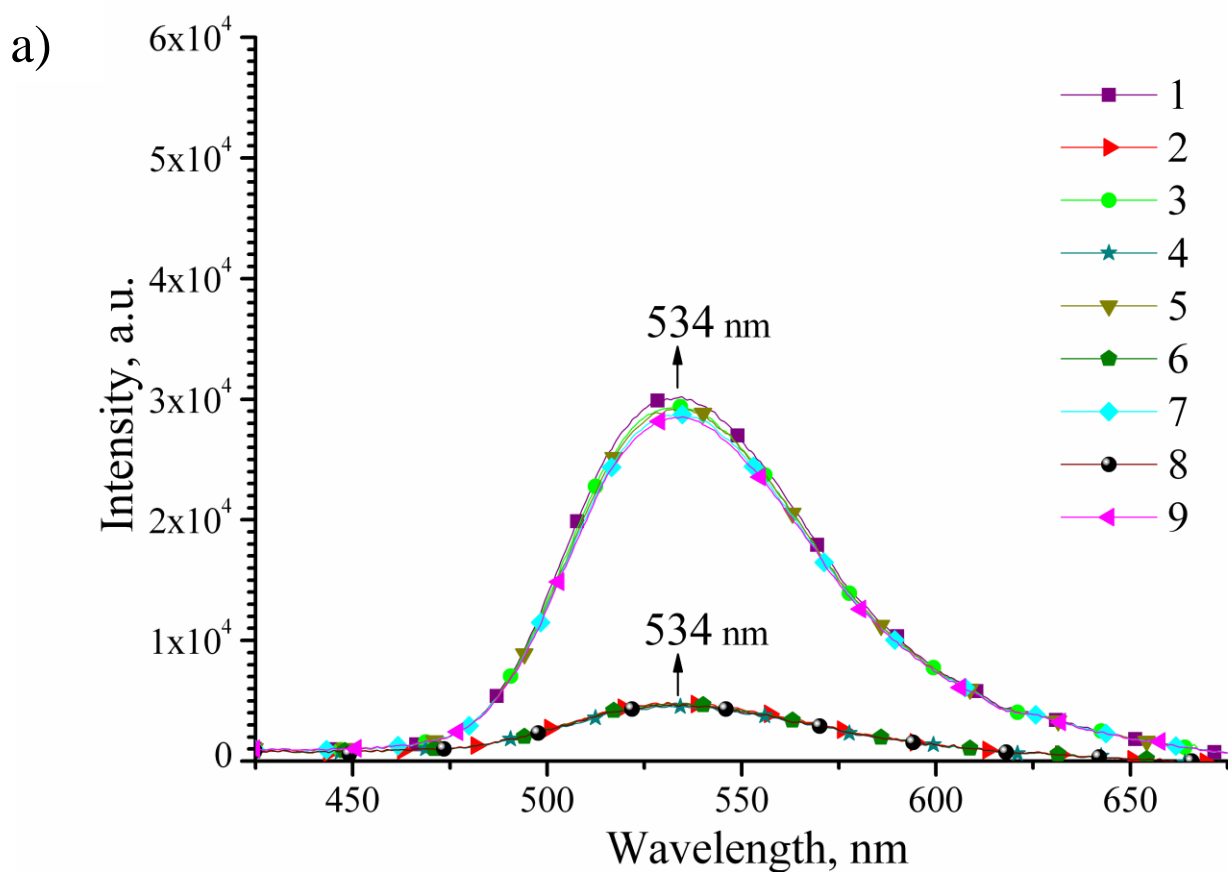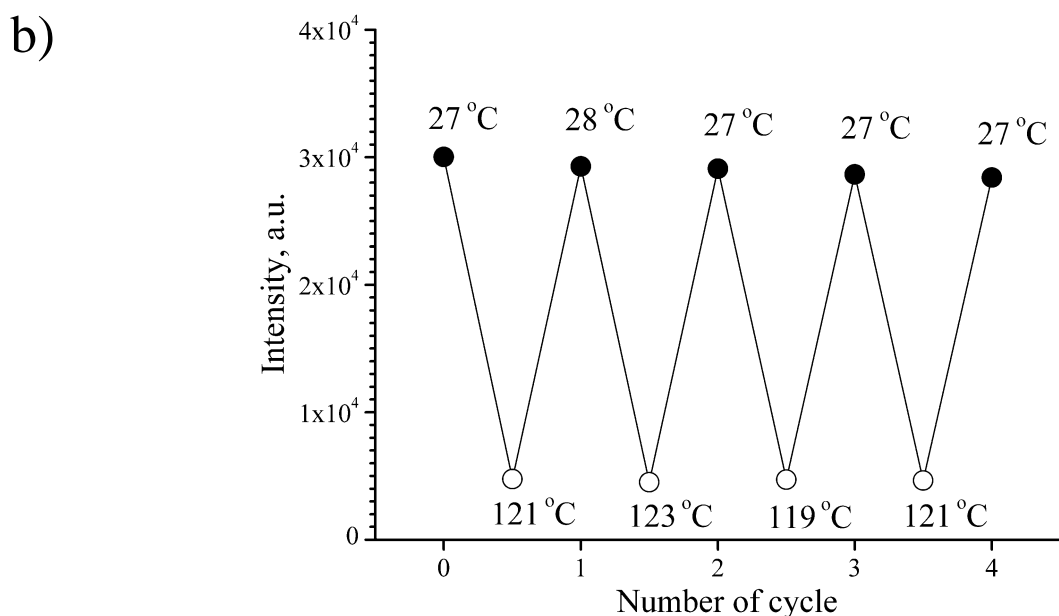

**Fig. S7** Photoluminescence of ashless cellulose filter paper saturated with  $\text{Cu}(\text{HA})_2$  ( $1.5 \cdot 10^{-3}$  mol/L) water solution (excitation wavelength is 365 nm):

(a) Spectra recorded during repeated heating (up to 119-123 °C) and cooling (down to 27-28 °C) cycles. Paper temperatures are: (1) 27 °C, (2) 121 °C, (3) 28 °C, (4) 123 °C, (5) 27 °C, (6) 119 °C, (7) 27 °C, (8) 121 °C, (9) 27 °C;

(b) Reversible switching of the emission intensity at 534 nm by repeated heating (up to 119-123 °C) and cooling (down to 27-28 °C) cycles.



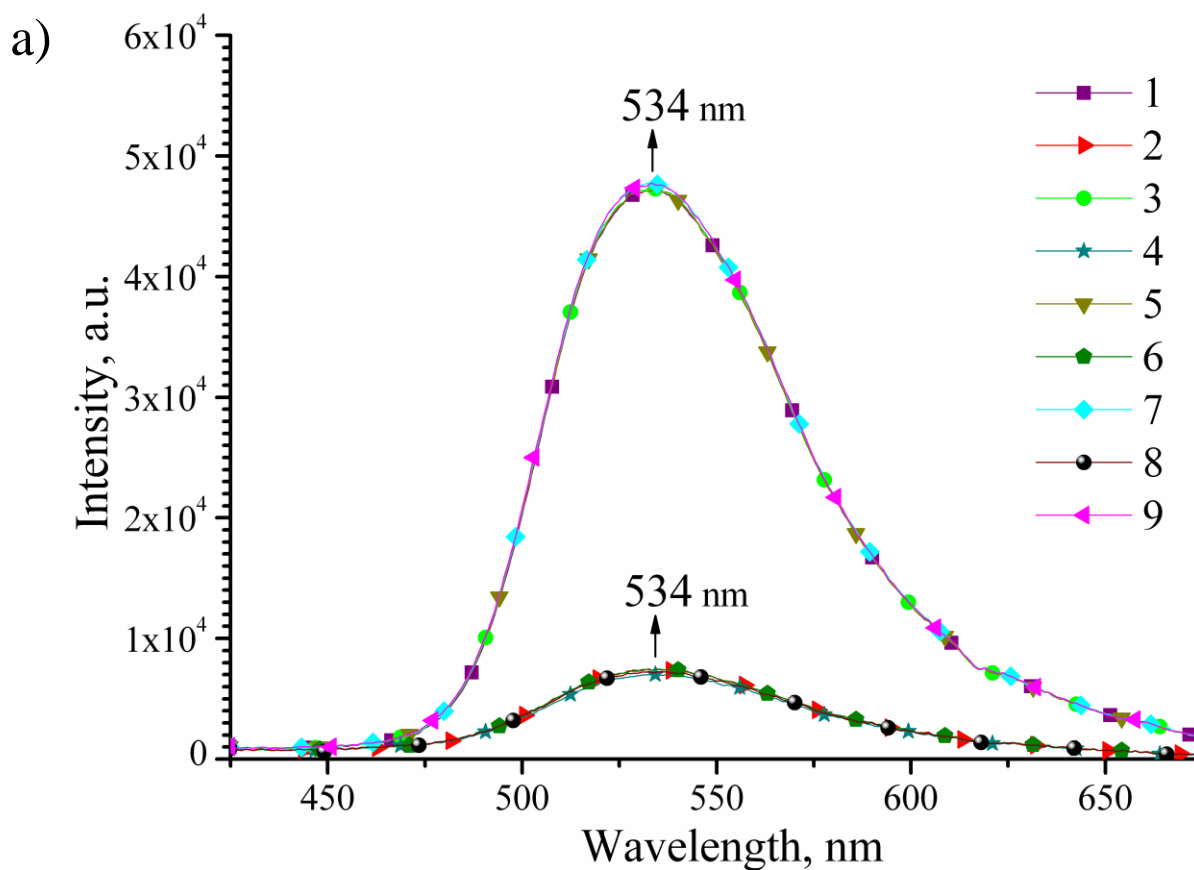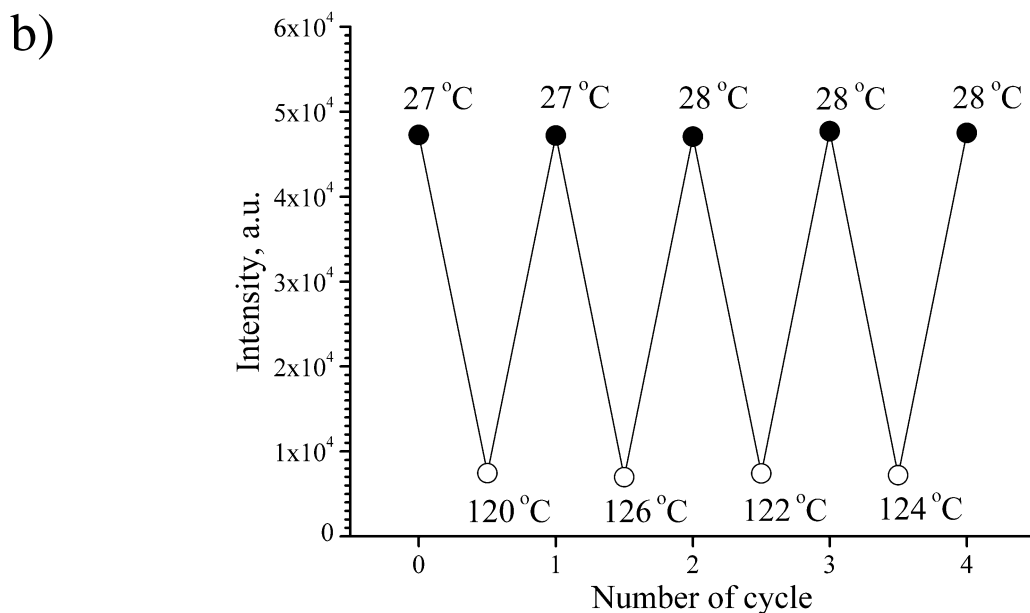

**Fig. S8** Photoluminescence of ashless cellulose filter paper saturated with  $\text{Cd}(\text{HA})_2$  ( $3.0 \cdot 10^{-3}$  mol/L) water solution (excitation wavelength is 365 nm):

(a) Spectra recorded during repeated heating (up to 122-124 °C) and cooling (down to 27-28 °C) cycles. Paper temperatures are: (1) 27 °C, (2) 121 °C, (3) 28 °C, (4) 123 °C, (5) 27 °C, (6) 119 °C, (7) 27 °C, (8) 121 °C, (9) 27 °C.

(b) Reversible switching of the emission intensity at 534 nm by repeated heating (up to 119-123 °C) and cooling (down to 27-28 °C) cycles.

a)

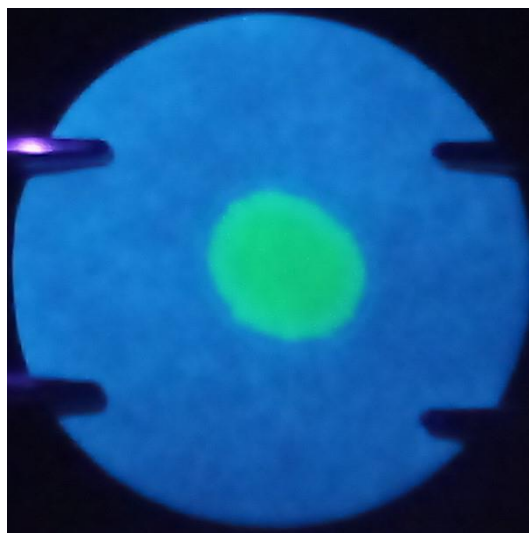

b)

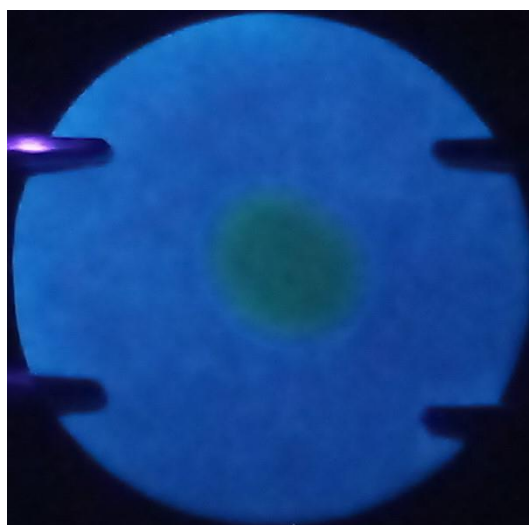

c)

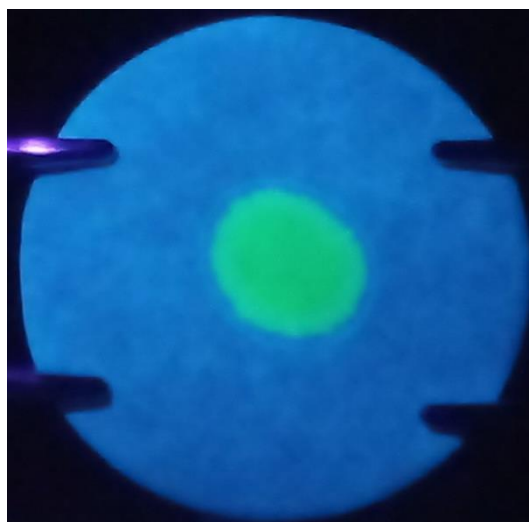

**Fig. S9** Photoluminescence of salt  $\text{Cu}(\text{HA})_2$  adsorbed on ashless cellulose filter paper from water solution (excitation wavelength is 365 nm). Concentration of  $\text{Cu}(\text{HA})_2$  in water solution was  $1.5 \cdot 10^{-3}$  mol/L. Paper temperatures are:  
(a) 27 °C (before heating);  
(b) 123 °C (during heating);  
(c) 27 °C (after cooling).

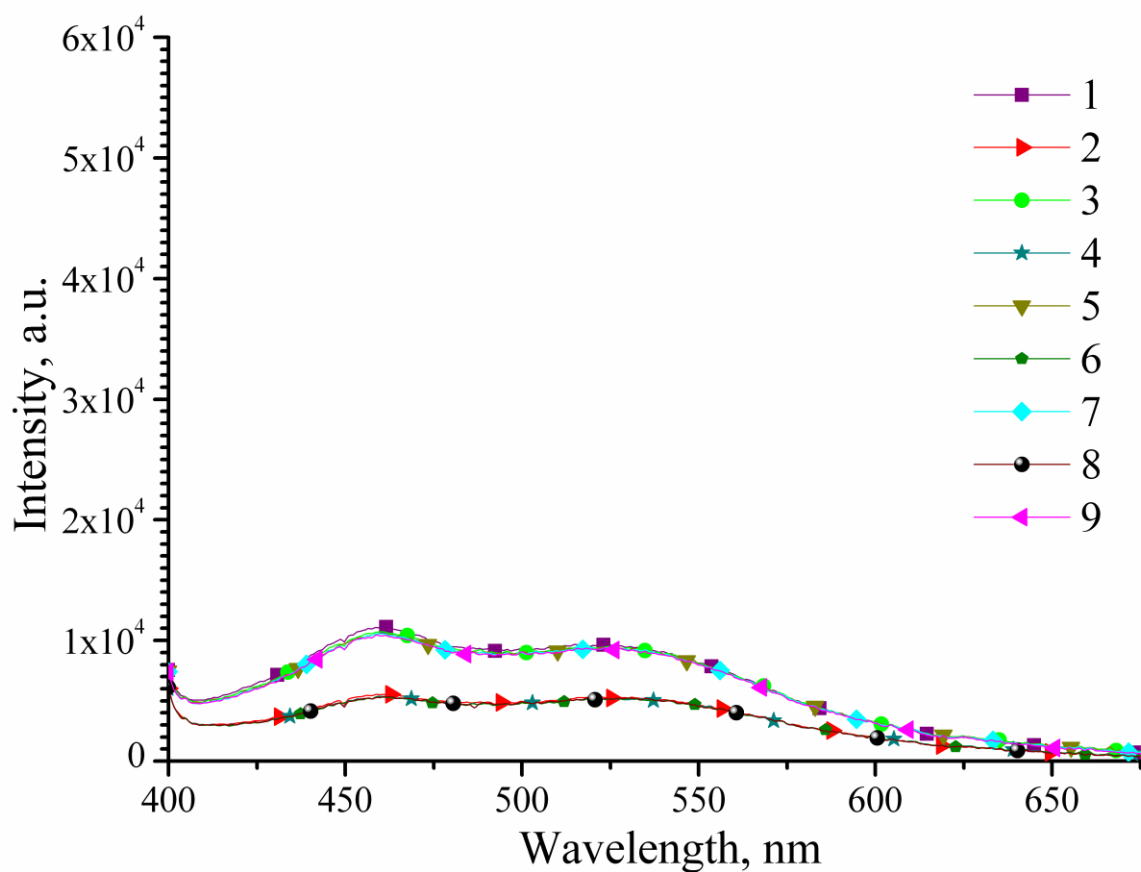

**Fig. S10** Photoluminescence spectra recorded during repeated heating (up to 119-126 °C) and cooling (down to 27-28 °C) cycles of ashless cellulose filter paper. Excitation wavelength is 365 nm. Paper temperatures are: (1) 27 °C, (2) 120 °C, (3) 27 °C, (4) 120 °C, (5) 27 °C, (6) 122 °C, (7) 27 °C, (8) 120 °C, (9) 27 °C.

**Table S1** Crystallographic data and structure refinement results for complexes [Mn(HA)<sub>2</sub>(H<sub>2</sub>O)<sub>4</sub>] $\cdot$ 2H<sub>2</sub>O (**1**) and [Zn(HA)<sub>2</sub>(H<sub>2</sub>O)<sub>4</sub>] (**2**).

| Complex №                                                                                                                       | <b>1</b>                                                                                                                     | <b>2</b>                                                                                           |
|---------------------------------------------------------------------------------------------------------------------------------|------------------------------------------------------------------------------------------------------------------------------|----------------------------------------------------------------------------------------------------|
| Chemical formula                                                                                                                | [Mn(C <sub>8</sub> HN <sub>4</sub> O <sub>2</sub> ) <sub>2</sub> (H <sub>2</sub> O) <sub>4</sub> ] $\cdot$ 2H <sub>2</sub> O | [Zn(C <sub>8</sub> HN <sub>4</sub> O <sub>2</sub> ) <sub>2</sub> (H <sub>2</sub> O) <sub>4</sub> ] |
| Formula weight                                                                                                                  | 533.29                                                                                                                       | 507.69                                                                                             |
| Temperature/K                                                                                                                   | 295(2)                                                                                                                       | 295(2)                                                                                             |
| Wavelength/Å                                                                                                                    | 1.54184                                                                                                                      | 0.71054                                                                                            |
| Crystal system                                                                                                                  | Triclinic                                                                                                                    | Triclinic                                                                                          |
| Space group                                                                                                                     | $P\bar{1}$                                                                                                                   | $P\bar{1}$                                                                                         |
| <i>a</i> /Å                                                                                                                     | 6.963(2)                                                                                                                     | 7.0540(6)                                                                                          |
| <i>b</i> /Å                                                                                                                     | 8.5910(10)                                                                                                                   | 7.9485(6)                                                                                          |
| <i>c</i> /Å                                                                                                                     | 10.532(2)                                                                                                                    | 9.4149(7)                                                                                          |
| $\alpha$ /°                                                                                                                     | 105.20(2)                                                                                                                    | 90.829(6)                                                                                          |
| $\beta$ /°                                                                                                                      | 97.89(2)                                                                                                                     | 110.004(6)                                                                                         |
| $\gamma$ /°                                                                                                                     | 109.80(2)                                                                                                                    | 93.622(6)                                                                                          |
| <i>V</i> /Å <sup>3</sup>                                                                                                        | 554.0(2)                                                                                                                     | 494.68(7)                                                                                          |
| <i>Z</i>                                                                                                                        | 1                                                                                                                            | 1                                                                                                  |
| Calculated density/mg·m <sup>-3</sup>                                                                                           | 1.598                                                                                                                        | 1.704                                                                                              |
| Absorption coefficient/mm <sup>-1</sup>                                                                                         | 5.500                                                                                                                        | 1.307                                                                                              |
| <i>F</i> (000)                                                                                                                  | 271                                                                                                                          | 256                                                                                                |
| Reflections measured                                                                                                            | 2257                                                                                                                         | 5028                                                                                               |
| Independent reflections                                                                                                         | 2130                                                                                                                         | 2120                                                                                               |
| <i>R</i> <sub>int</sub>                                                                                                         | 0.0356                                                                                                                       | 0.0933                                                                                             |
| Refinement method                                                                                                               | Full-matrix least-squares on <i>F</i> <sup>2</sup>                                                                           |                                                                                                    |
| Data/restraints/parameters                                                                                                      | 2130/0/189                                                                                                                   | 2120/0/167                                                                                         |
| Goodness-of-fit on <i>F</i> <sup>2</sup>                                                                                        | 1.076                                                                                                                        | 0.973                                                                                              |
| <i>R</i> <sup>a</sup> [ <i>I</i> > 2σ( <i>I</i> )]                                                                              | 0.0389                                                                                                                       | 0.0616                                                                                             |
| w <i>R</i> ( <i>F</i> <sup>2</sup> ) <sup>b</sup> (all reflections)                                                             | 0.1053                                                                                                                       | 0.1685                                                                                             |
| Δρ <sub>max</sub> , Δρ <sub>min</sub> /e·Å <sup>-3</sup>                                                                        | 0.324, -0.667                                                                                                                | 1.116, -0.502                                                                                      |
| <sup>a</sup> $R = \sum  F_o - F_c  / \sum  F_o $ . <sup>b</sup> $wR(F^2) = [\sum w(F_o^2 - F_c^2)^2 / \sum w(F_o^2)^2]^{1/2}$ . |                                                                                                                              |                                                                                                    |

**Table S2** Selected bond lengths [Å] and angles [°] for complexes [Mn(HA)<sub>2</sub>(H<sub>2</sub>O)<sub>4</sub>] $\cdot$ 2H<sub>2</sub>O (**1**) and [Zn(HA)<sub>2</sub>(H<sub>2</sub>O)<sub>4</sub>] (**2**).

| Coordination polyhedron                                                            | Bond length |          | Bond angles |           |
|------------------------------------------------------------------------------------|-------------|----------|-------------|-----------|
| <b>1</b>                                                                           |             |          |             |           |
| 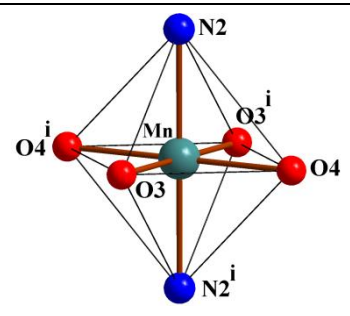  | Mn-O3       | 2.161(2) | O3-Mn-N2    | 86.41(9)  |
|                                                                                    | Mn-O4       | 2.135(2) | O4-Mn-O3    | 90.16(10) |
|                                                                                    | Mn-N2       | 2.253(2) | O4-Mn-N2    | 90.08(10) |
| Symmetry transformations used to generate equivalent atoms: (i) $-x+1, -y+1, -z$   |             |          |             |           |
| <b>2</b>                                                                           |             |          |             |           |
|  | Zn-O3       | 2.170(4) | O3-Zn-N4    | 88.27(17) |
|                                                                                    | Zn-O4       | 2.046(4) | O4-Zn-N4    | 86.07(17) |
|                                                                                    | Zn-N4       | 2.117(4) | O4-Zn-O3    | 90.84(18) |
| Symmetry transformations used to generate equivalent atoms: (i) $-x+1, -y, -z$     |             |          |             |           |

**Table S3** Hydrogen bond geometries for complexes  $[\text{Mn}(\text{HA})_2(\text{H}_2\text{O})_4]\cdot 2\text{H}_2\text{O}$  (**1**) and  $[\text{Zn}(\text{HA})_2(\text{H}_2\text{O})_4]$  (**2**).

| D-H...A                                                                                                                                                                                             | D-H (Å) | H...A (Å) | D...A (Å) | D-H...A (°) |
|-----------------------------------------------------------------------------------------------------------------------------------------------------------------------------------------------------|---------|-----------|-----------|-------------|
| <b>1</b>                                                                                                                                                                                            |         |           |           |             |
| N1-H1...O1 <sup>vi</sup>                                                                                                                                                                            | 0.80(3) | 2.08(4)   | 2.876(3)  | 176(3)      |
| O3-H3...O5 <sup>v</sup>                                                                                                                                                                             | 0.80(4) | 2.07(4)   | 2.833(4)  | 159(4)      |
| O3-H31...O2 <sup>ii</sup>                                                                                                                                                                           | 0.83(5) | 2.01(6)   | 2.835(3)  | 176(5)      |
| O4-H4...O5                                                                                                                                                                                          | 0.85(4) | 1.94(5)   | 2.787(4)  | 176(4)      |
| O4-H41...N3                                                                                                                                                                                         | 0.79(5) | 2.33(5)   | 2.976(3)  | 141(5)      |
| O4-H41...N4 <sup>viii</sup>                                                                                                                                                                         | 0.79(5) | 2.65(5)   | 3.221(4)  | 131(5)      |
| O5-H5...N4 <sup>iii</sup>                                                                                                                                                                           | 0.95(6) | 1.94(6)   | 2.861(4)  | 162(5)      |
| O5-H51...O1 <sup>vii</sup>                                                                                                                                                                          | 0.89(7) | 2.25(8)   | 2.917(3)  | 132(6)      |
| Symmetry transformations used to generate equivalent atoms: (ii) $-x+2, -y+1, -z+1$ ; (iii) $x-1, y, z-1$ ; (v) $x+1, y, z$ ; (vi) $-x+1, -y, -z+1$ ; (vii) $x, y+1, z$ ; (viii) $-x+2, -y+2, -z+1$ |         |           |           |             |
| <b>2</b>                                                                                                                                                                                            |         |           |           |             |
| N1-H1...O3 <sup>v</sup>                                                                                                                                                                             | 0.86    | 2.20      | 3.000(6)  | 155.2       |
| O3-H3...O1 <sup>vii</sup>                                                                                                                                                                           | 0.69(7) | 2.06(8)   | 2.748(6)  | 173(8)      |
| O3-H31...N2 <sup>ii</sup>                                                                                                                                                                           | 0.78(8) | 2.14(8)   | 2.871(6)  | 155(7)      |
| O4-H4...N3 <sup>vi</sup>                                                                                                                                                                            | 0.71(8) | 2.03(8)   | 2.732(6)  | 169(8)      |
| O4-H41...O2                                                                                                                                                                                         | 0.81(7) | 2.07(7)   | 2.810(5)  | 151(6)      |
| Symmetry transformations used to generate equivalent atoms: (ii) $x-1, y-1, z-1$ ; (v) $x, y+1, z$ ; (vi) $x-1, y, z-1$ ; (vii) $-x+2, -y+1, -z$                                                    |         |           |           |             |

**Table S4** Effect of temperature on luminescence intensity of ashless cellulose filter paper saturated with salt ( $\text{Mn}(\text{HA})_2$ ,  $\text{Zn}(\text{HA})_2$ ,  $\text{DMA}^+_{\text{HA}}^-$ ,  $\text{Cu}(\text{HA})_2$ ,  $\text{Cd}(\text{HA})_2$ , Rhodamine 6G) water solution <sup>a</sup>.

|                              |                                                                       |                                                                                |                                                                         |                                                                                  |                                                                                 |
|------------------------------|-----------------------------------------------------------------------|--------------------------------------------------------------------------------|-------------------------------------------------------------------------|----------------------------------------------------------------------------------|---------------------------------------------------------------------------------|
| $\text{Mn}(\text{HA})_2$     | Luminescence peak intensity at 27 °C ( $I_{\text{Peak}_{27}}$ , a.u.) | Luminescence intensity of background at 532 nm at 27 °C ( $I_{0_{27}}$ , a.u.) | Luminescence peak intensity at 123 °C ( $I_{\text{Peak}_{123}}$ , a.u.) | Luminescence intensity of background at 532 nm at 123 °C ( $I_{0_{123}}$ , a.u.) | $\frac{I_{\text{Peak}_{27}} - I_{0_{27}}}{I_{\text{Peak}_{123}} - I_{0_{123}}}$ |
|                              | 48413                                                                 | 568                                                                            | 8097                                                                    | 568                                                                              | <b>6.4</b>                                                                      |
| $\text{Zn}(\text{HA})_2$     | Luminescence peak intensity at 28 °C ( $I_{\text{Peak}_{28}}$ , a.u.) | Luminescence intensity of background at 532 nm at 28 °C ( $I_{0_{28}}$ , a.u.) | Luminescence peak intensity at 123 °C ( $I_{\text{Peak}_{123}}$ , a.u.) | Luminescence intensity of background at 532 nm at 123 °C ( $I_{0_{123}}$ , a.u.) | $\frac{I_{\text{Peak}_{28}} - I_{0_{28}}}{I_{\text{Peak}_{123}} - I_{0_{123}}}$ |
|                              | 38979                                                                 | 1061                                                                           | 6513                                                                    | 749                                                                              | <b>6.6</b>                                                                      |
| $\text{DMA}^+_{\text{HA}}^-$ | Luminescence peak intensity at 27 °C ( $I_{\text{Peak}_{27}}$ , a.u.) | Luminescence intensity of background at 531 nm at 27 °C ( $I_{0_{27}}$ , a.u.) | Luminescence peak intensity at 123 °C ( $I_{\text{Peak}_{123}}$ , a.u.) | Luminescence intensity of background at 531 nm at 123 °C ( $I_{0_{123}}$ , a.u.) | $\frac{I_{\text{Peak}_{27}} - I_{0_{27}}}{I_{\text{Peak}_{123}} - I_{0_{123}}}$ |
|                              | 42287                                                                 | 789                                                                            | 7826                                                                    | 624                                                                              | <b>5.8</b>                                                                      |
| $\text{Cu}(\text{HA})_2$     | Luminescence peak intensity at 28 °C ( $I_{\text{Peak}_{28}}$ , a.u.) | Luminescence intensity of background at 534 nm at 28 °C ( $I_{0_{28}}$ , a.u.) | Luminescence peak intensity at 123 °C ( $I_{\text{Peak}_{123}}$ , a.u.) | Luminescence intensity of background at 534 nm at 123 °C ( $I_{0_{123}}$ , a.u.) | $\frac{I_{\text{Peak}_{28}} - I_{0_{28}}}{I_{\text{Peak}_{123}} - I_{0_{123}}}$ |
|                              | 29267                                                                 | 620                                                                            | 4536                                                                    | 402                                                                              | <b>6.9</b>                                                                      |
| $\text{Cd}(\text{HA})_2$     | Luminescence peak intensity at 28 °C ( $I_{\text{Peak}_{28}}$ , a.u.) | Luminescence intensity of background at 534 nm at 28 °C ( $I_{0_{28}}$ , a.u.) | Luminescence peak intensity at 124 °C ( $I_{\text{Peak}_{124}}$ , a.u.) | Luminescence intensity of background at 534 nm at 124 °C ( $I_{0_{124}}$ , a.u.) | $\frac{I_{\text{Peak}_{28}} - I_{0_{28}}}{I_{\text{Peak}_{124}} - I_{0_{124}}}$ |
|                              | 47825                                                                 | 673                                                                            | 7254                                                                    | 547                                                                              | <b>7.0</b>                                                                      |
| Rhodamine 6G                 | Luminescence peak intensity at 28 °C ( $I_{\text{Peak}_{28}}$ , a.u.) | Luminescence intensity of background at 562 nm at 28 °C ( $I_{0_{28}}$ , a.u.) | Luminescence peak intensity at 124 °C ( $I_{\text{Peak}_{124}}$ , a.u.) | Luminescence intensity of background at 562 nm at 124 °C ( $I_{0_{124}}$ , a.u.) | $\frac{I_{\text{Peak}_{28}} - I_{0_{28}}}{I_{\text{Peak}_{124}} - I_{0_{124}}}$ |
|                              | 49246                                                                 | 3856                                                                           | 30795                                                                   | 2489                                                                             | <b>1.6</b>                                                                      |

<sup>a</sup> Concentration of  $\text{M}(\text{HA})_2$  in water solution is  $2.9 \cdot 10^{-3}$  mol/L ( $\text{M} = \text{Mn}$ ),  $3.0 \cdot 10^{-3}$  mol/L ( $\text{M} = \text{Cd}$ ),  $1.5 \cdot 10^{-3}$  mol/L ( $\text{M} = \text{Cu}$ ),  $1.1 \cdot 10^{-3}$  mol/L ( $\text{M} = \text{Zn}$ ). Concentration of  $\text{DMA}^+_{\text{HA}}^-$  in water solution is  $2.9 \cdot 10^{-3}$  mol/L. Concentration of Rhodamine 6G in water solution is  $6.1 \cdot 10^{-5}$  mol/L.

Excitation wavelength is 365 nm.
